# Supplementary material for: HIV infection is associated with elevated biomarkers of immune activation in Ugandan adults with pneumonia
Source: PubMed Central journal article supplement (PMC6519791; doi:10.1371/journal.pone.0216680), 2019-05-15
Supplement: pone.0216680.s001.pdf [file pone.0216680.s001.pdf]

**S1 Table. Median biomarker measurements, by HIV status and ART use**

| <b>Biomarkers,<br/>median [IQR]</b> | <b>HIV-uninfected<br/>(n = 82)</b> |               | <b>HIV-infected, on ART<br/>(n = 29)</b> |                | <b>p-value*</b> | <b>HIV-infected, not on ART<br/>(n = 62)</b> |                | <b>p-value*</b> |
|-------------------------------------|------------------------------------|---------------|------------------------------------------|----------------|-----------------|----------------------------------------------|----------------|-----------------|
| IL-6 (pg/mL)                        | 14.0                               | [3.1 – 34.4]  | 43.2                                     | [10.1 – 87.3]  | 0.002           | 23.2                                         | [8.1 – 44.5]   | 0.03            |
| sTNFR-1 (ng/mL)                     | 1.49                               | [1.04 – 2.06] | 2.25                                     | [1.51 – 4.22]  | 0.001           | 2.43                                         | [1.65 – 3.44]  | <0.001          |
| sTNFR-2 (ng/mL)                     | 3.81                               | [3.01 – 6.17] | 6.36                                     | [4.76 – 17.5]  | <0.001          | 7.31                                         | [5.38 – 11.8]  | <0.001          |
| hsCRP (µg/mL)                       | 20.1                               | [5.9 – 61.2]  | 88.4                                     | [23.5 – 172.7] | 0.002           | 45.4                                         | [15.1 – 135.9] | 0.01            |
| Fibrinogen (mg/mL)                  | 6.25                               | [4.25 – 9.76] | 8.41                                     | [3.23 – 14.2]  | 0.40            | 7.58                                         | [4.42 – 11.9]  | 0.27            |
| D-dimer (ng/mL)                     | 574                                | [317 – 1,504] | 1,082                                    | [806 – 2,194]  | 0.001           | 1,061                                        | [479 – 2,650]  | 0.002           |
| sCD27 (U/mL)                        | 37.6                               | [17.7 – 56.3] | 46.9                                     | [27.6 – 94.4]  | 0.05            | 63.8                                         | [29.3 – 122.6] | <0.001          |
| IP-10 (ng/mL)                       | 0.51                               | [0.20 – 1.01] | 1.59                                     | [0.55 – 2.34]  | <0.001          | 1.01                                         | [0.59 – 1.71]  | <0.001          |
| sCD14 (µg/mL)                       | 2.24                               | [1.76 – 2.87] | 4.23                                     | [3.66 – 5.73]  | <0.001          | 3.23                                         | [2.64 – 4.33]  | <0.001          |
| sCD163 (ng/mL)                      | 776                                | [508 – 1,399] | 1,094                                    | [695 – 1,589]  | 0.02            | 928                                          | [595 – 1,526]  | 0.12            |
| Hyaluronan (ng/mL)                  | 37.4                               | [22.7 – 60.2] | 55.1                                     | [32.8 – 116.4] | 0.01            | 80.9                                         | [36.1 – 151.5] | <0.001          |
| IFABP (ng/mL)                       | 0.94                               | [0.59 – 1.58] | 0.98                                     | [0.65 – 27.6]  | 0.62            | 0.59                                         | [0.29 – 1.48]  | 0.14            |

\* compared with HIV-uninfected participants, differences tested by Mann-Whitney *U* Test
