# Supplementary material for: HIV infection is associated with elevated biomarkers of immune activation in Ugandan adults with pneumonia
Source: PubMed Central journal article supplement (PMC6519791; doi:10.1371/journal.pone.0216680), 2019-05-15
Supplement: pone.0216680.s002.pdf [file pone.0216680.s002.pdf]

**S2 Table. Sensitivity analysis comparing coefficient estimates for the effect of HIV status on log<sub>10</sub>-transformed plasma biomarker level divided by interquartile range, after adjustment for age, heart rate, respiratory rate, oxygen status, and functional status with multiple linear regression modeling for the entire cohort to estimates for only those participants diagnosed with tuberculosis**

| <b>Biomarker</b>                      | <b>Entire cohort</b> |                | <b>Only TB</b>     |                |
|---------------------------------------|----------------------|----------------|--------------------|----------------|
|                                       | <b>Coefficient</b>   | <b>p-value</b> | <b>Coefficient</b> | <b>p-value</b> |
| Interleukin 6                         | 0.185                | 0.09           | 0.212              | 0.09           |
| Soluble TNF Receptor 1                | 0.371                | <0.001         | 0.388              | 0.001          |
| Soluble TNF Receptor 2                | 0.594                | <0.001         | 0.652              | <0.001         |
| High sensitivity C-reactive protein   | 0.289                | 0.04           | 0.062              | 0.70           |
| Fibrinogen                            | 0.155                | 0.40           | 0.076              | 0.30           |
| D-dimer                               | 0.303                | 0.007          | 0.190              | 0.17           |
| Soluble CD27                          | 0.326                | 0.007          | 0.367              | 0.02           |
| IFN-γ-Inducible Protein 10            | 0.427                | <0.001         | 0.387              | 0.005          |
| Soluble CD14                          | 0.712                | <0.001         | 0.725              | <0.001         |
| Soluble CD163                         | 0.163                | 0.15           | 0.223              | 0.13           |
| Hyaluronan                            | 0.447                | <0.001         | 0.591              | <0.001         |
| Intestinal Fatty Acid Binding Protein | -0.109               | 0.48           | -0.156             | 0.46           |
