# Supplementary material for: HIV infection is associated with elevated biomarkers of immune activation in Ugandan adults with pneumonia
Source: PubMed Central journal article supplement (PMC6519791; doi:10.1371/journal.pone.0216680), 2019-05-15
Supplement: pone.0216680.s003.pdf [file pone.0216680.s003.pdf]

**S3 Table. Median biomarker measurements, comparing participants known to be alive at 2 months and participants lost to follow-up**

| <b>Biomarkers,<br/>median [IQR]</b> | <b>Alive at 2 months<br/>(n = 151)</b> |                | <b>Lost to follow-up<br/>(n = 9)</b> |                | <b>p-value</b> |
|-------------------------------------|----------------------------------------|----------------|--------------------------------------|----------------|----------------|
| IL-6 (pg/mL)                        | 18.7                                   | [5.2 – 40.4]   | 17.8                                 | [6.2 – 34.8]   | 0.79           |
| sTNFR-1 (ng/mL)                     | 1.85                                   | [1.23 – 2.73]  | 2.41                                 | [1.28 – 3.51]  | 0.57           |
| sTNFR-2 (ng/mL)                     | 5.23                                   | [3.47 – 7.83]  | 8.20                                 | [3.80 – 14.60] | 0.41           |
| hsCRP (µg/mL)                       | 31.6                                   | [9.8 – 89.1]   | 32.2                                 | [13.1 – 98.0]  | 0.76           |
| Fibrinogen (mg/mL)                  | 7.32                                   | [4.25 – 11.69] | 6.80                                 | [4.77 – 8.98]  | 0.98           |
| D-dimer (ng/mL)                     | 905                                    | [473 – 1,780]  | 975                                  | [476 – 1134]   | 0.63           |
| sCD27 (U/mL)                        | 43.3                                   | [21.5 – 73.9]  | 53.0                                 | [44.2 – 61.0]  | 0.30           |
| IP-10 (ng/mL)                       | 0.75                                   | [0.39 – 1.46]  | 0.57                                 | [0.19 – 0.76]  | 0.26           |
| sCD14 (µg/mL)                       | 2.77                                   | [2.11 – 3.80]  | 3.37                                 | [2.69 – 5.05]  | 0.13           |
| sCD163 (ng/mL)                      | 858                                    | [567 – 1,399]  | 945                                  | [576 - 1,544]  | 0.76           |
| Hyaluronan (ng/mL)                  | 44.1                                   | [25.6 – 87.9]  | 44.7                                 | [26.2 – 290.1] | 0.70           |
| IFABP (ng/mL)                       | 0.86                                   | [0.46 – 1.49]  | 0.59                                 | [0.30 – 3.63]  | 0.75           |

Differences were tested by Mann-Whitney *U* Test.
