# Supplementary material for: HIV infection is associated with elevated biomarkers of immune activation in Ugandan adults with pneumonia
Source: PubMed Central journal article supplement (PMC6519791; doi:10.1371/journal.pone.0216680), 2019-05-15
Supplement: pone.0216680.s004.pdf [file pone.0216680.s004.pdf]

**S4 Table. Risk ratios, with 95% confidence intervals, comparing the risk of mortality for the highest tertile compared to lower tertiles for each biomarker, stratified by HIV**

| <b>Biomarker</b>                      | <b>Risk Ratio<br/>HIV-uninfected</b> | <b>Risk Ratio<br/>HIV-infected</b> | <b><i>p</i>-value*</b> | <b>Crude Combined<br/>Risk Ratio</b> | <b>Mantel-Haenszel<br/>Combined Risk<br/>Ratio</b> |
|---------------------------------------|--------------------------------------|------------------------------------|------------------------|--------------------------------------|----------------------------------------------------|
| Interleukin 6                         | 3.50 (0.53, 23.14)                   | 3.83 (0.82, 17.88)                 | 0.94                   | 4.04 (1.27, 12.8)                    | 3.72 (1.11, 12.4)                                  |
| Soluble TNF Receptor 1                | 4.79 (0.74, 31.16)                   | 3.95 (0.87, 17.90)                 | 0.87                   | 4.71 (1.52, 14.6)                    | 4.17 (1.25, 13.89)                                 |
| Soluble TNF Receptor 2                | 4.79 (0.74, 31.16)                   | 2.37 (0.63, 8.84)                  | 0.54                   | 3.44 (1.18, 10.0)                    | 2.85 (0.97, 8.37)                                  |
| High sensitivity C-reactive protein   | 3.50 (0.53, 22.93)                   | 8.69 (1.13, 66.66)                 | 0.50                   | 6.13 (1.74, 21.6)                    | 6.10 (1.49, 24.99)                                 |
| Fibrinogen                            | 4.67 (0.45, 48.71)                   | 0.47 (0.11, 2.11)                  | 0.11                   | 0.98 (0.31, 3.08)                    | 0.90 (0.30, 2.74)                                  |
| D-dimer                               | 0.95 (0.10, 8.66)                    | 1.13 (0.33, 3.90)                  | 0.89                   | 1.23 (0.42, 3.57)                    | 1.08 (0.37, 3.19)                                  |
| Soluble CD27                          | 0                                    | 0.85 (0.21, 3.50)                  | 0.69                   | 0.86 (0.23, 3.16)                    | 0.64 (0.16, 2.61)                                  |
| IFN- $\gamma$ -Inducible Protein 10   | 4.06 (0.62, 26.68)                   | 3.76 (0.83, 17.05)                 | 0.95                   | 4.34 (1.40, 13.5)                    | 3.85 (1.16, 12.78)                                 |
| Soluble CD14                          | 2.67 (0.31, 23.00)                   | 7.09 (0.93, 54.2)                  | 0.49                   | 4.71 (1.52, 14.6)                    | 5.38 (1.14, 25.31)                                 |
| Soluble CD163                         | 2.38 (0.35, 15.90)                   | 3.59 (0.97, 13.28)                 | 0.73                   | 3.29 (1.13, 9.57)                    | 3.16 (1.08, 9.23)                                  |
| Hyaluronan                            | 1.92 (0.22, 16.93)                   | 3.59 (0.79, 16.25)                 | 0.64                   | 3.35 (1.15, 9.75)                    | 3.07 (0.88, 10.68)                                 |
| Intestinal Fatty Acid Binding Protein | 0.71 (0.07, 7.43)                    | 1.53 (0.43, 5.46)                  | 0.57                   | 1.01 (0.32, 3.18)                    | 1.23 (0.41, 3.75)                                  |

\* *p*-value for the chi-squared test for homogeneity
